# Supplementary material
Source: Springer Nature journal article supplement (https://www.springermedizin.de/resource/supplementary/12876_2013_1135_MOESM2_ESM.pdf/9438168)
Supplement: MOESM2 [file 9438168]

Patient  
Characteristics

**Sociodemographics**

**Health Literacy**

**Health  
Characteristics**

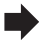

Predictor Domains of  
Intention

**Perceived  
Susceptibility**

**Efficacy of Testing**

**Worry**

**Salience/Coherence**

**Self-Efficacy**

**Social Influence**

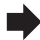

**Intention to  
Undergo  
Endoscopy for  
Esophageal  
Cancer  
Surveillance**
